# Supplementary material
Source: MDPI journal article supplement (https://www.mdpi.com/2306-5338/8/4/164)
Supplement: s1 [file s1]

# Hydroclimatological Patterns and Limnological Characteristics of Unique Wetland Systems on the Argentine High Andean Plateau

Diego Frau <sup>1,\*</sup>, Brendan J. Moran <sup>2,\*</sup>, Felicity Arengo <sup>3</sup>, Patricia Marconi <sup>4</sup>, Yamila Battauz <sup>5</sup>, Celeste Mora <sup>1</sup>,  
Ramiro Manzo <sup>1</sup>, Gisela Mayora <sup>1</sup> and David F. Boutt <sup>2</sup>

<sup>1</sup> Instituto Nacional de Limnología (CONICET-UNL), Ciudad Universitaria S/N, 3000 Santa Fe, Argentina; celestora@hotmail.com (C.M.);  
ramiromanzo@gmail.com (R.M.); giselamayora@hotmail.com (G.M.)

<sup>2</sup> Department of Geosciences, University of Massachusetts-Amherst, 233 Morrill Science Center, 627 North Pleasant Street, Amherst, MA 01003-9297, USA;  
dboutt@geo.umass.edu

<sup>3</sup> Center for Biodiversity and Conservation, American Museum of Natural History, 200 Central Park West, New York, NY 10024-5102, USA; farengo@amnh.org

<sup>4</sup> Fundación YUCHAN, Mariano Moreno 1950, Villa San Lorenzo, 4401 Salta, Argentina; huaico1709@gmail.com

<sup>5</sup> Facultad de Ciencias y Tecnología, Ruta Provincial N° 11. Km 10.5, Universidad Autónoma de Entre Ríos, 3100 Oro Verde, Argentina;  
yamilabattauz@gmail.com

\* Correspondence: diegofrau@gmail.com (D.F.); b Moran@umass.edu (B.J.M.)

Contents:

**Figure S1**

**Table S1**

**Table S2**

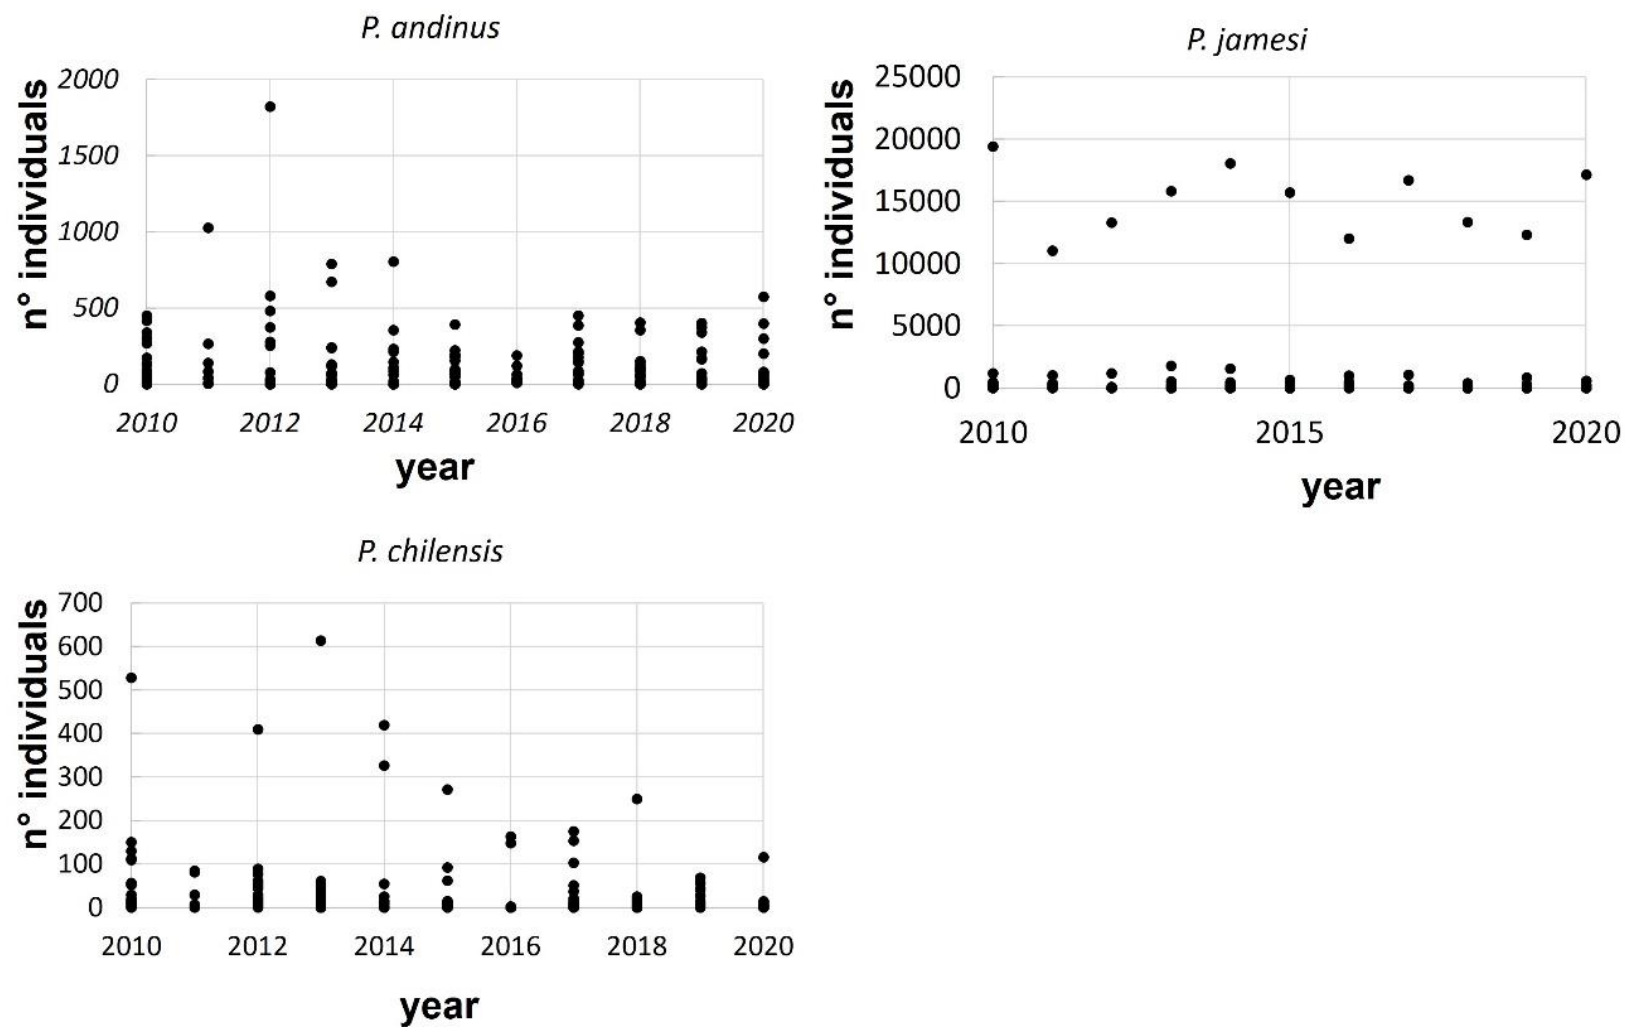

**Figure S1.** Total number of flamingos from the three species recorded reported on each wetland censused from years 2010 to 2020.

**Table S1.** Wetlands sampled and limnological sampling dates.

| <b>Wetland</b> | <b>Sampling Dates</b>                  |
|----------------|----------------------------------------|
| Aguas Dulces   | Jan-10                                 |
| Alumbrera      | Jan-10; Feb-13; Feb 17; Feb-19; Feb-20 |
| Antofagasta    | Jan-10; Feb-13; Feb 17; Feb-19; Feb-20 |
| Los Aparejos   | Jan-10; Feb-17; Feb-19                 |
| Archibarca     | Jan-10; Feb-13                         |
| Azul           | Feb-17; Feb-19; Feb-20                 |
| Cabi           | feb-19                                 |
| Carachi Pampa  | Feb-17; Feb-19; Feb-20                 |
| Caro           | feb-19                                 |
| Cortaderas     | Feb-13                                 |
| Grande         | Jan-10; Feb-13; Feb 17; Feb-19; Feb-20 |
| Hedionda       | Feb-19; Feb-20                         |
| Negra          | Feb-17; Feb-19; Feb-20                 |
| El Peinado     | Jan-10                                 |
| Las Peñas      | Feb-13; Feb-17; Feb-19; Feb-20         |
| Purulla        | Jan-10; Feb-13; Feb-17                 |
| San Francisco  | Jan-10; Feb-13                         |
| Tres Quebradas | Jan-17                                 |
| Las Tunas      | feb-20                                 |
| Verde          | feb-17                                 |

**Table S2.** Summary of dissolved major Ion data in surface waters.

| Sample ID | Location             | Water Type | Date     | SC ( $\mu\text{S}/\text{cm}$ ) | T ( $^{\circ}\text{C}$ ) | pH   | TDS (mg/L) | mmol/l |       |       |         |         |        |       |
|-----------|----------------------|------------|----------|--------------------------------|--------------------------|------|------------|--------|-------|-------|---------|---------|--------|-------|
|           |                      |            |          |                                |                          |      |            | Ca     | K     | Mg    | Na      | Cl      | SO4    | HCO3- |
| PNA6      | Laguna San Fransisco | Lagoon     | 2-Feb-19 | ND                             | 19.1                     | 8.5  | 14,244     | 4.67   | 23.99 | 28.95 | 166.88  | 158.30  | 16.70  | 6.93  |
| PNA11     | Laguna los Aparejos  | Lagoon     | 3-Feb-19 | ND                             | 11.2                     | 7.9  | 3171       | 0.85   | 0.75  | 4.58  | 20.35   | 29.94   | 3.89   | 9.50  |
| PNA15     | Laguna Azul          | Lagoon     | 3-Feb-19 | 4500                           | 21.6                     | 8.9  | 3260       | 0.31   | 1.93  | 10.97 | 22.90   | 12.44   | 3.74   | 24.58 |
| PNA30     | Laguna Grande        | Lagoon     | 5-Feb-19 | 8430                           | 14.7                     | 10.0 | 7670       | 0.22   | 4.87  | 0.09  | 155.01  | 70.85   | 2.75   | 15.09 |
| PNA30     | Laguna Grande        | Lagoon     | 9-Feb-20 | 52,475                         | 23.8                     | 9.5  | 38,721     | 8.39   | 23.60 | 0.94  | 566.76  | 520.04  | 12.93  | 62.22 |
| PNA33     | Laguna Cabi          | Lagoon     | 5-Feb-19 | 55,500                         | 23.5                     | 9.4  | 41,285     | 4.26   | 37.69 | 0.34  | 676.31  | 527.30  | 34.84  | 25.89 |
| PNA41     | Carachi Pampa lagoon | Lagoon     | 6-Feb-19 | 128,200                        | 25.5                     | 7.7  | 136,863    | 4.05   | 66.32 | 87.38 | 2144.46 | 2090.72 | 78.98  | 13.20 |
| PNA41     | Carachi Pampa lagoon | Lagoon     | 8-Feb-20 | 19,370                         | 27.76                    | 7.82 | 137,262    | 2.60   | 69.86 | 92.10 | 2167.15 | 1983.95 | 112.48 | 17.32 |
| PNA44     | Laguna Alumbreira    | Lagoon     | 7-Feb-19 | 4560                           | 11                       | 9.3  | 2051       | 0.76   | 1.55  | 1.33  | 26.49   | 12.07   | 2.89   | 9.26  |
| PNA44     | Laguna Alumbreira    | Lagoon     | 5-Feb-20 | 1153                           | 26.57                    | 8.97 | 929        | 0.59   | 0.57  | 0.50  | 10.01   | 5.02    | 1.06   | 4.97  |
| PNA45     | Laguna Antofagasta   | Lagoon     | 7-Feb-19 | 1620                           | 19                       | 9.7  | 1084       | 0.46   | 0.65  | 0.64  | 13.42   | 5.33    | 1.34   | 5.81  |
| PNA45     | Laguna Antofagasta   | Lagoon     | 7-Feb-20 | 2029                           | 27.59                    | 8.63 | 1554       | 0.95   | 0.89  | 0.80  | 18.57   | 10.02   | 2.74   | 6.53  |
| PNA54     | Laguna Caro          | Lagoon     | 8-Feb-19 | 73,800                         | 19.8                     | 8.1  | 61,515     | 26.05  | 29.09 | 18.24 | 840.96  | 982.34  | 43.62  | 3.88  |

|                 |                    |        |              |         |       |     |         |        |        |        |         |         |       |        |
|-----------------|--------------------|--------|--------------|---------|-------|-----|---------|--------|--------|--------|---------|---------|-------|--------|
| PNA125          | Laguna<br>Diamante | Lagoon | 9-Feb-<br>20 | 230,000 | 18.37 | 8.5 | 255,938 | 10.87  | 155.39 | 1.29   | 4131.28 | 3789.68 | ND    | 262.10 |
| Sureda,<br>2003 | Purulla            | Lagoon | Jan-00       | 61,160  | 16    | 8   | 59,381  | 0.96   | 24.23  | 194.95 | 623.10  | 859.17  | 26.34 | 58.75  |
| Sureda,<br>2003 | Negra              | Lagoon | May-01       | 147,760 | 27    | 7   | 40,938  | 77.35  | 13.04  | 33.33  | 378.43  | 699.52  | 21.03 | 15.41  |
| Sureda,<br>2003 | Verde              | Lagoon | May-01       | ND      | 20    | 7   | 310,180 | 573.88 | 79.29  | 119.32 | 4784.74 | 4795.08 | 3.33  | 5.25   |
| Sureda,<br>2003 | Peinado            | Lagoon | May-01       | 135,840 | 32    | 8   | 45,190  | 67.37  | 13.30  | 39.09  | 434.98  | 722.08  | 34.25 | 32.78  |
